# Supplementary material for: Ultra-Stretchable and Self-Healing Anti-Freezing Strain Sensors Based on Hydrophobic Associated Polyacrylic Acid Hydrogels
Source: MDPI journal article supplement (doi:10.3390/ma14206165), 2021-10-18
Supplement: s1 [file s1]

## Supporting Information

# **Ultra-Stretchable and Self-Healing Anti-Freezing Strain Sensors based on Hydrophobic Associated Polyacrylic Acid Hydrogels**

*Shuya Yin,<sup>a</sup> Gehong Su,<sup>a,b</sup> Jiajun Chen,<sup>a</sup> Xiaoyan Peng,<sup>a</sup> and Tao Zhou<sup>a,\*</sup>*

<sup>a</sup> State Key Laboratory of Polymer Materials Engineering of China, Polymer Research Institute, Sichuan University, Chengdu 610065, China; <sup>b</sup> College of Science, Sichuan Agricultural University, Ya'an, 625014, China

\*Corresponding author. Tel.: +86-28-85402601; Fax: +86-28-85402465; E-mail address: zhoutaopoly@scu.edu.cn (T. Zhou)

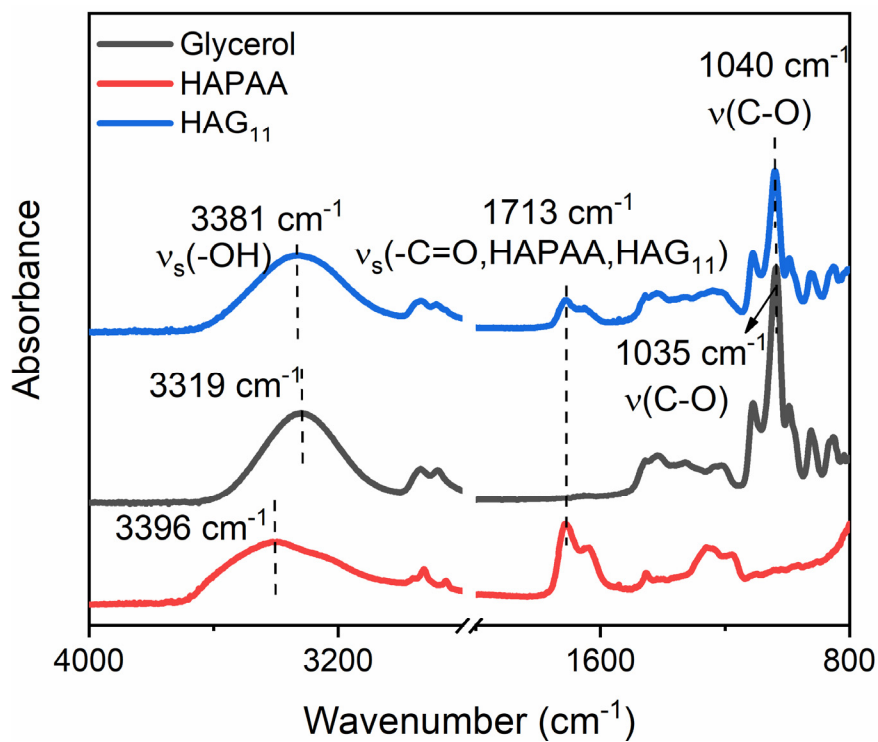

**Figure S1.** ATR-FTIR spectra of glycerol, HAPAA, and HAG<sub>11</sub> hydrogels.

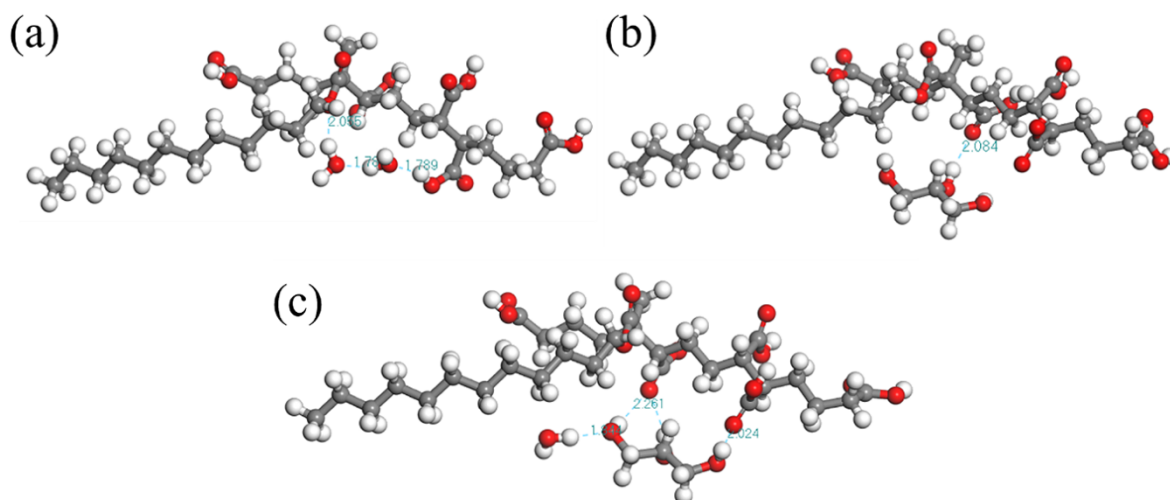

**Figure S2.** DFT-optimized structure of glycerol, H<sub>2</sub>O, and HAPAA. The interaction models of (a) H<sub>2</sub>O-HAPAA, (b) glycerol-HAPAA, and (c) H<sub>2</sub>O-glycerol-HAPAA.

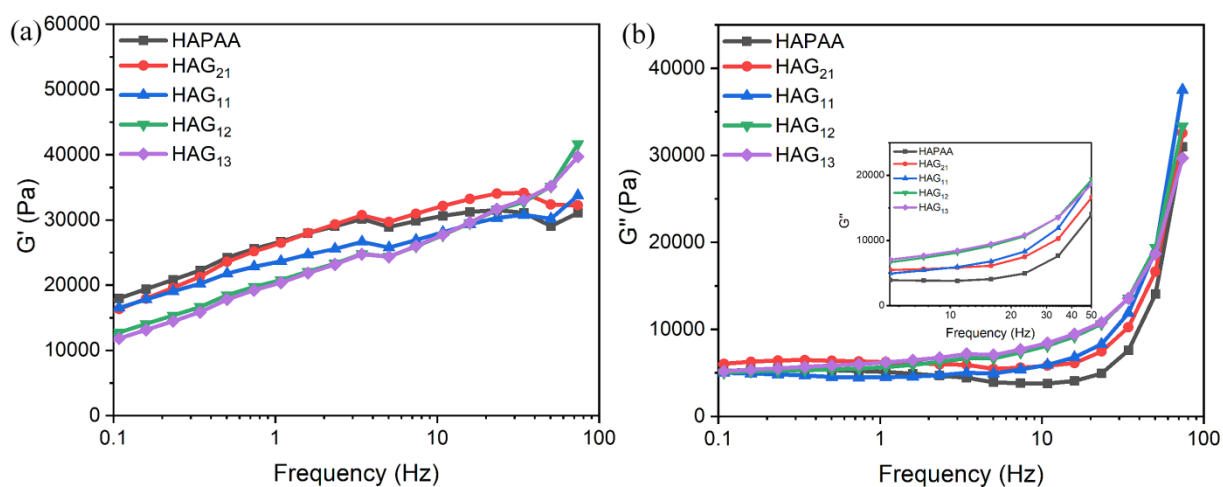

**Figure S3.** (a) Storage modulus ( $G'$ ), and (b) the loss modulus ( $G''$ ) of the HAPAA and HAG<sub>x</sub> hydrogels.

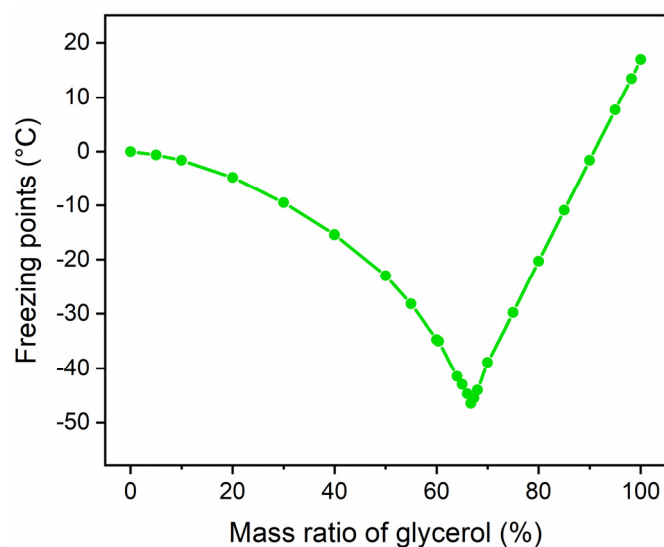

**Figure S4.** Relationship between the freezing points and the glycerol mass ratio in the glycerol-water mixed solutions.<sup>1</sup>

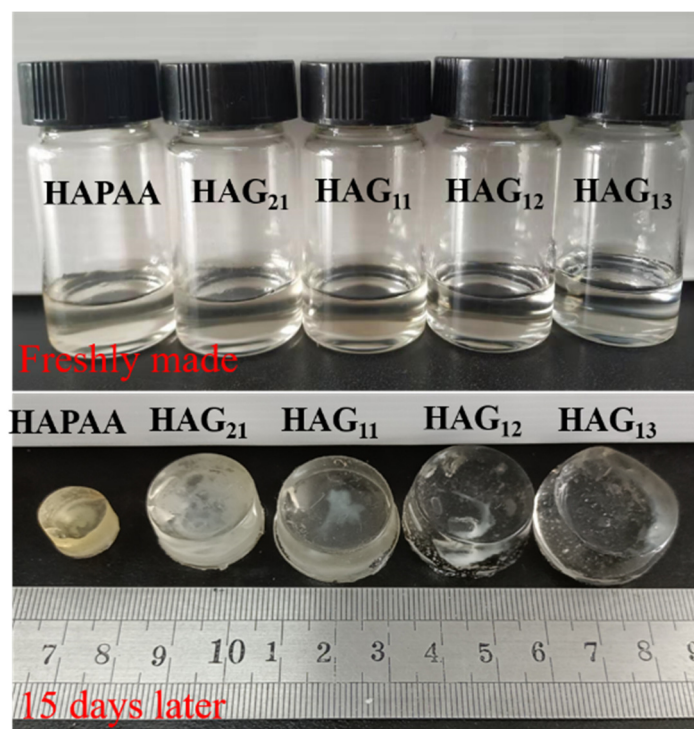

**Figure S5.** Comparison of the freshly prepared HAPAA and HAGx hydrogels (top) and after a storage time of 15 days (bottom).

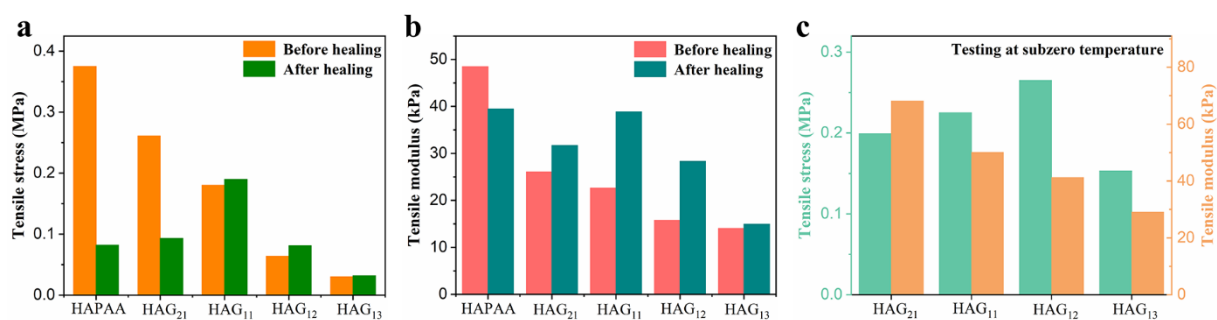

**Figure S6. (a-b)** The tensile stress and (b) modulus of HAPAA and HAG<sub>x</sub> hydrogels before and after self-healing (RT, 24h). **(c)** The tensile stress and modulus of HAPAA and HAG<sub>x</sub> hydrogels at subzero temperature.

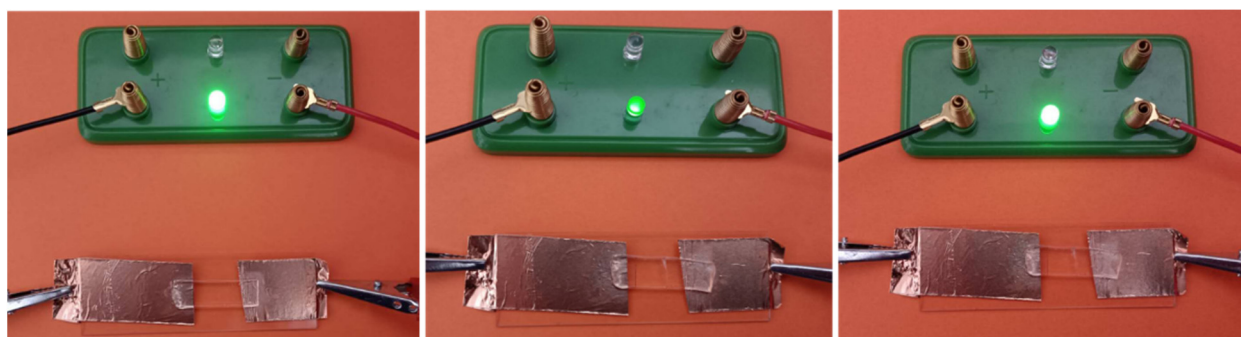

**Figure S7.** Circuits comprised of the HAG<sub>11</sub> hydrogel and a green LED light: **(a)** original, **(b)** cutting off and being contacted immediately, **(c)** self-healing for 6 h.

**Table S1.** Compositions of the HAPAA hydrogel and HAG<sub>x</sub> hydrogels

| Samples           | AA(g) | LMA(g) | CTAB(g) | H <sub>2</sub> O(g) | Glycerol(g) | APS(mg) | H <sub>2</sub> O/Glycerol (wt/wt) |
|-------------------|-------|--------|---------|---------------------|-------------|---------|-----------------------------------|
| HAPAA             | 2.5   | 0.2    | 0.3     | 7.00                | 0           | 1       | --                                |
| HAG <sub>21</sub> | 2.5   | 0.2    | 0.3     | 4.67                | 2.33        | 1       | 2:1                               |
| HAG <sub>11</sub> | 2.5   | 0.2    | 0.3     | 3.50                | 3.50        | 1       | 1:1                               |
| HAG <sub>12</sub> | 2.5   | 0.2    | 0.3     | 2.33                | 4.67        | 1       | 1:2                               |
| HAG <sub>13</sub> | 2.5   | 0.2    | 0.3     | 1.75                | 5.25        | 1       | 1:3                               |

**Table S2.** The comparison of the HAG<sub>11</sub> hydrogel with other antifreeze stretchable hydrogels in mechanical strength

| Materials                    | Antifreeze temperature (°C) | Stretchability (%) | Tensile Strength (MPa) | Self-healing         | Refs.     |
|------------------------------|-----------------------------|--------------------|------------------------|----------------------|-----------|
| PVA (EG)                     | -40                         | 1000               | 1.5                    | Yes (freeze thawing) | 2         |
| PAMPS/PAAm (EG/LiCl)         | -80                         | 225                | 0.57                   | No                   | 3         |
| PAAm (CaCl <sub>2</sub> )    | -54                         | 450                | 0.12                   | No                   | 4         |
| PAAm/PVA (EG)                | -40                         | --                 | --                     | No                   | 5         |
| PAAm/casein (LiCl)           | -20                         | 1450               | 0.16                   | No                   | 6         |
| PVA-TA@talc (EG)             | -30                         | 700                | 0.6                    | No                   | 7         |
| PVA-PAA (EG)                 | -25                         | 550                | 0.025                  | No                   | 8         |
| PAA-PANI (Glycerol)          | -26                         | 1000               | 0.035                  | Yes                  | 9         |
| PAA-PAAm (Glycerol)          | -20                         | 600                | 0.075                  | No                   | 10        |
| HAG <sub>11</sub> (Glycerol) | -70                         | 4000               | 0.18                   | Yes                  | This work |

**Table S3.** Interaction energies in H<sub>2</sub>O-HAPAA, glycerol-HAPAA, and glycerol-H<sub>2</sub>O-HAPAA by DFT calculations.

| Interaction pair                | Interaction energy (Ha) |
|---------------------------------|-------------------------|
| H <sub>2</sub> O-HAPAA          | -0.02013                |
| Glycerol-HAPAA                  | -0.00994                |
| Glycerol-H <sub>2</sub> O-HAPAA | -0.02651                |

## References

1. Lane, L. B., Freezing Points of Glycerol and Its Aqueous Solutions. *Industrial & Engineering Chemistry* **1925**, *17*, 924-924.
2. Rong, Q.; Lei, W.; Chen, L.; Yin, Y.; Zhou, J.; Liu, M., Anti-Freezing, Conductive Self-Healing Organohydrogels with Stable Strain-Sensitivity at Subzero Temperatures. *Angew Chem. Int. Ed. Engl.* **2017**, *56*, 14159-14163.
3. Lou, D.; Wang, C.; He, Z.; Sun, X.; Luo, J.; Li, J., Robust Organohydrogel with Flexibility and Conductivity across the Freezing and Boiling Temperatures of Water. *Chem. Commun.* **2019**, *55*, 8422-8425.
4. Morelle, X. P.; Illeperuma, W. R.; Tian, K.; Bai, R.; Suo, Z.; Vlassak, J. J., Highly Stretchable and Tough Hydrogels Below Water Freezing Temperature. *Adv. Mater.* **2018**, *30*, 1801541.
5. Liao, H.; Guo, X.; Wan, P.; Yu, G., Conductive Mxene Nanocomposite Organohydrogel for Flexible, Healable, Low-Temperature Tolerant Strain Sensors. *Adv. Funct. Mater.* **2019**, *29*, 1904507.
6. Wu, X.; Liao, H.; Ma, D.; Chao, M.; Wang, Y.; Jia, X.; Wan, P.; Zhang, L., A Wearable, Self-Adhesive, Long-Lastingly Moist and Healable Epidermal Sensor Assembled from Conductive Mxene Nanocomposites. *J. Mater. Chem. C* **2020**, *8*, 1788-1795.
7. Guan, L.; Yan, S.; Liu, X.; Li, X.; Gao, G., Wearable Strain Sensors Based on Casein-Driven Tough, Adhesive and Anti-Freezing Hydrogels for Monitoring Human-Motion. *J. Mater. Chem. B* **2019**, *7*, 5230-5236.
8. Ge, G.; Yuan, W.; Zhao, W.; Lu, Y.; Zhang, Y.; Wang, W.; Chen, P.; Huang, W.; Si, W.; Dong, X., Highly Stretchable and Autonomously Healable Epidermal Sensor Based on Multi-Functional Hydrogel Frameworks. *J. Mater. Chem. A* **2019**, *7*, 5949-5956.
9. Ge, G.; Lu, Y.; Qu, X.; Zhao, W.; Ren, Y.; Wang, W.; Wang, Q.; Huang, W.; Dong, X., Muscle-Inspired Self-Healing Hydrogels for Strain and Temperature Sensor. *ACS Nano* **2020**, *14*, 218-228.
10. Han, L.; Liu, K.; Wang, M.; Wang, K.; Fang, L.; Chen, H.; Zhou, J.; Lu, X., Mussel-Inspired Adhesive and Conductive Hydrogel with Long-Lasting Moisture and Extreme Temperature Tolerance. *Adv. Funct. Mater.* **2018**, *28*, 1704195.
